# Supplementary material
Source: bioRxiv or medRxiv preprint supplement (https://medrxiv.org/highwire/filestream/89806/field_highwire_adjunct_files/0/2020.07.13.20152181-1.pdf)

**Supplementary Fig. S1**

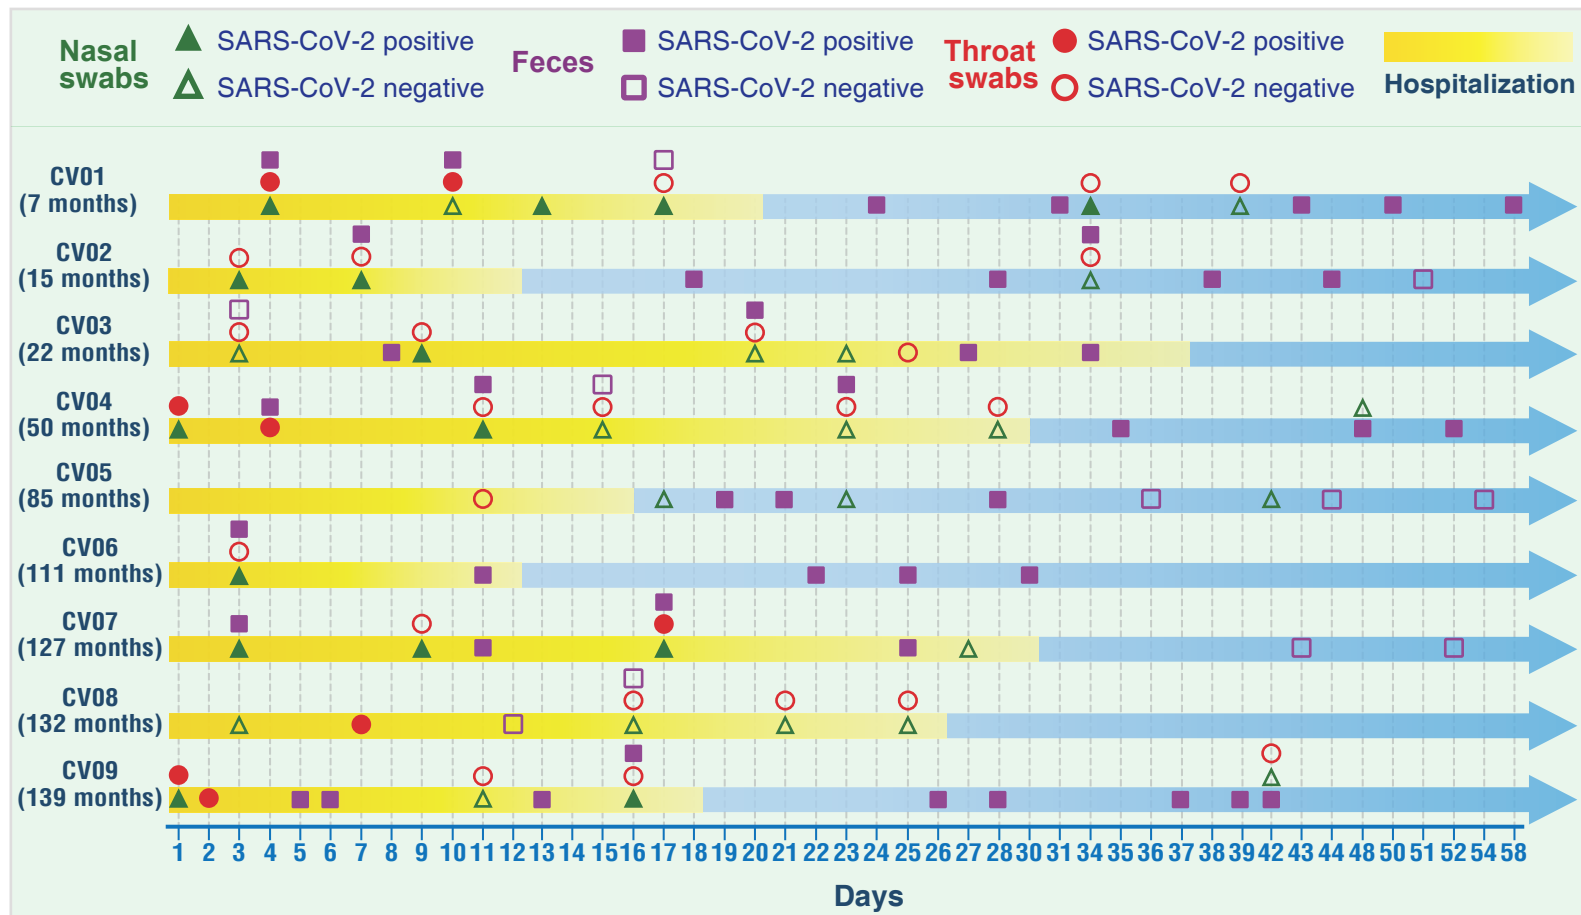

Supplementary Fig. S2

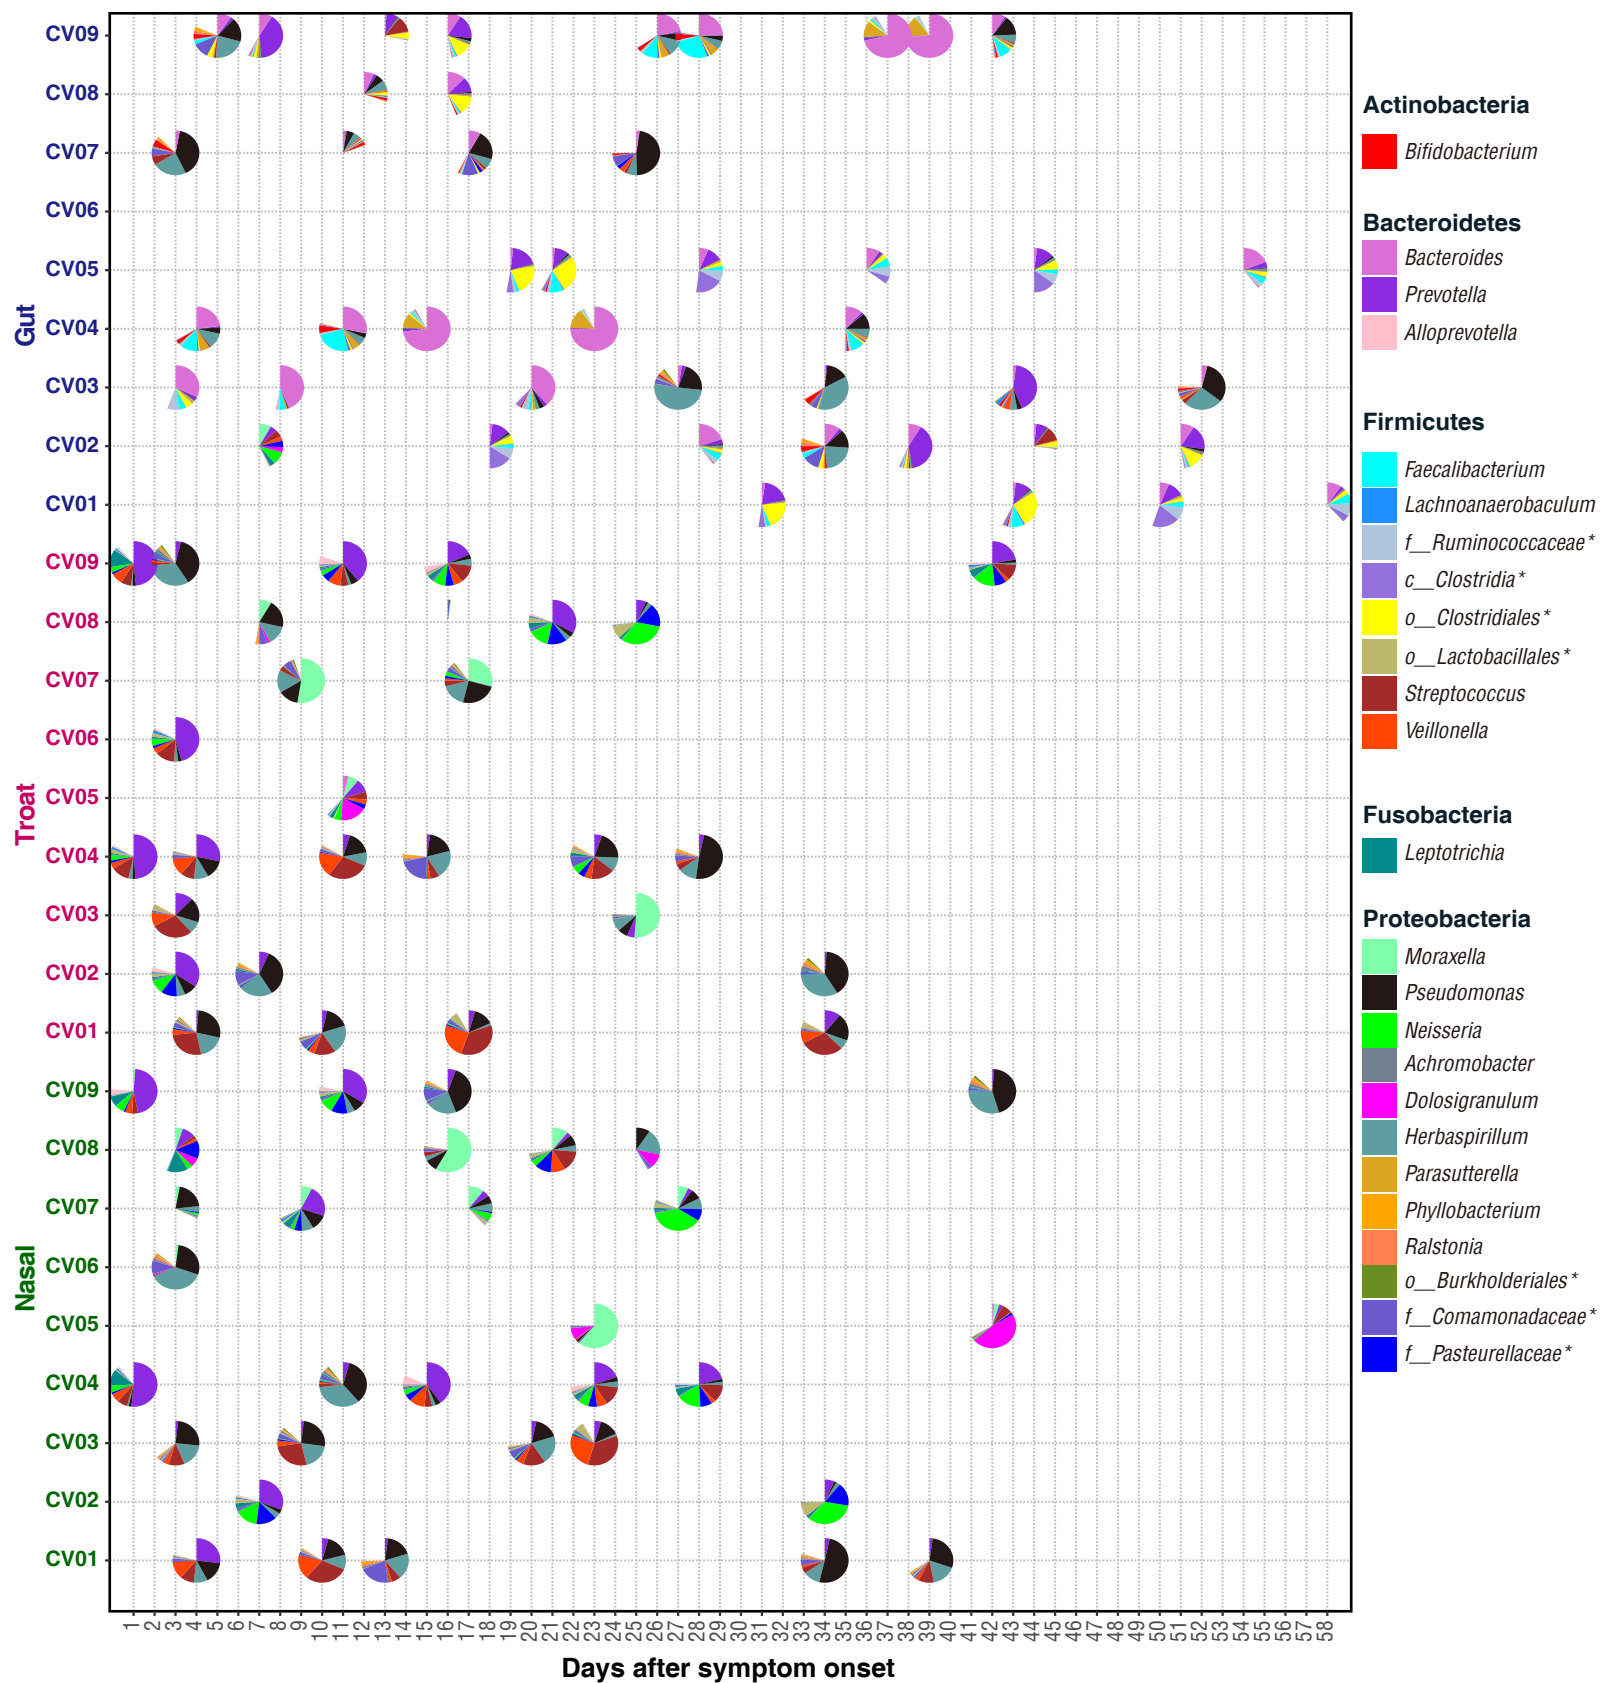

Supplementary Fig. S3

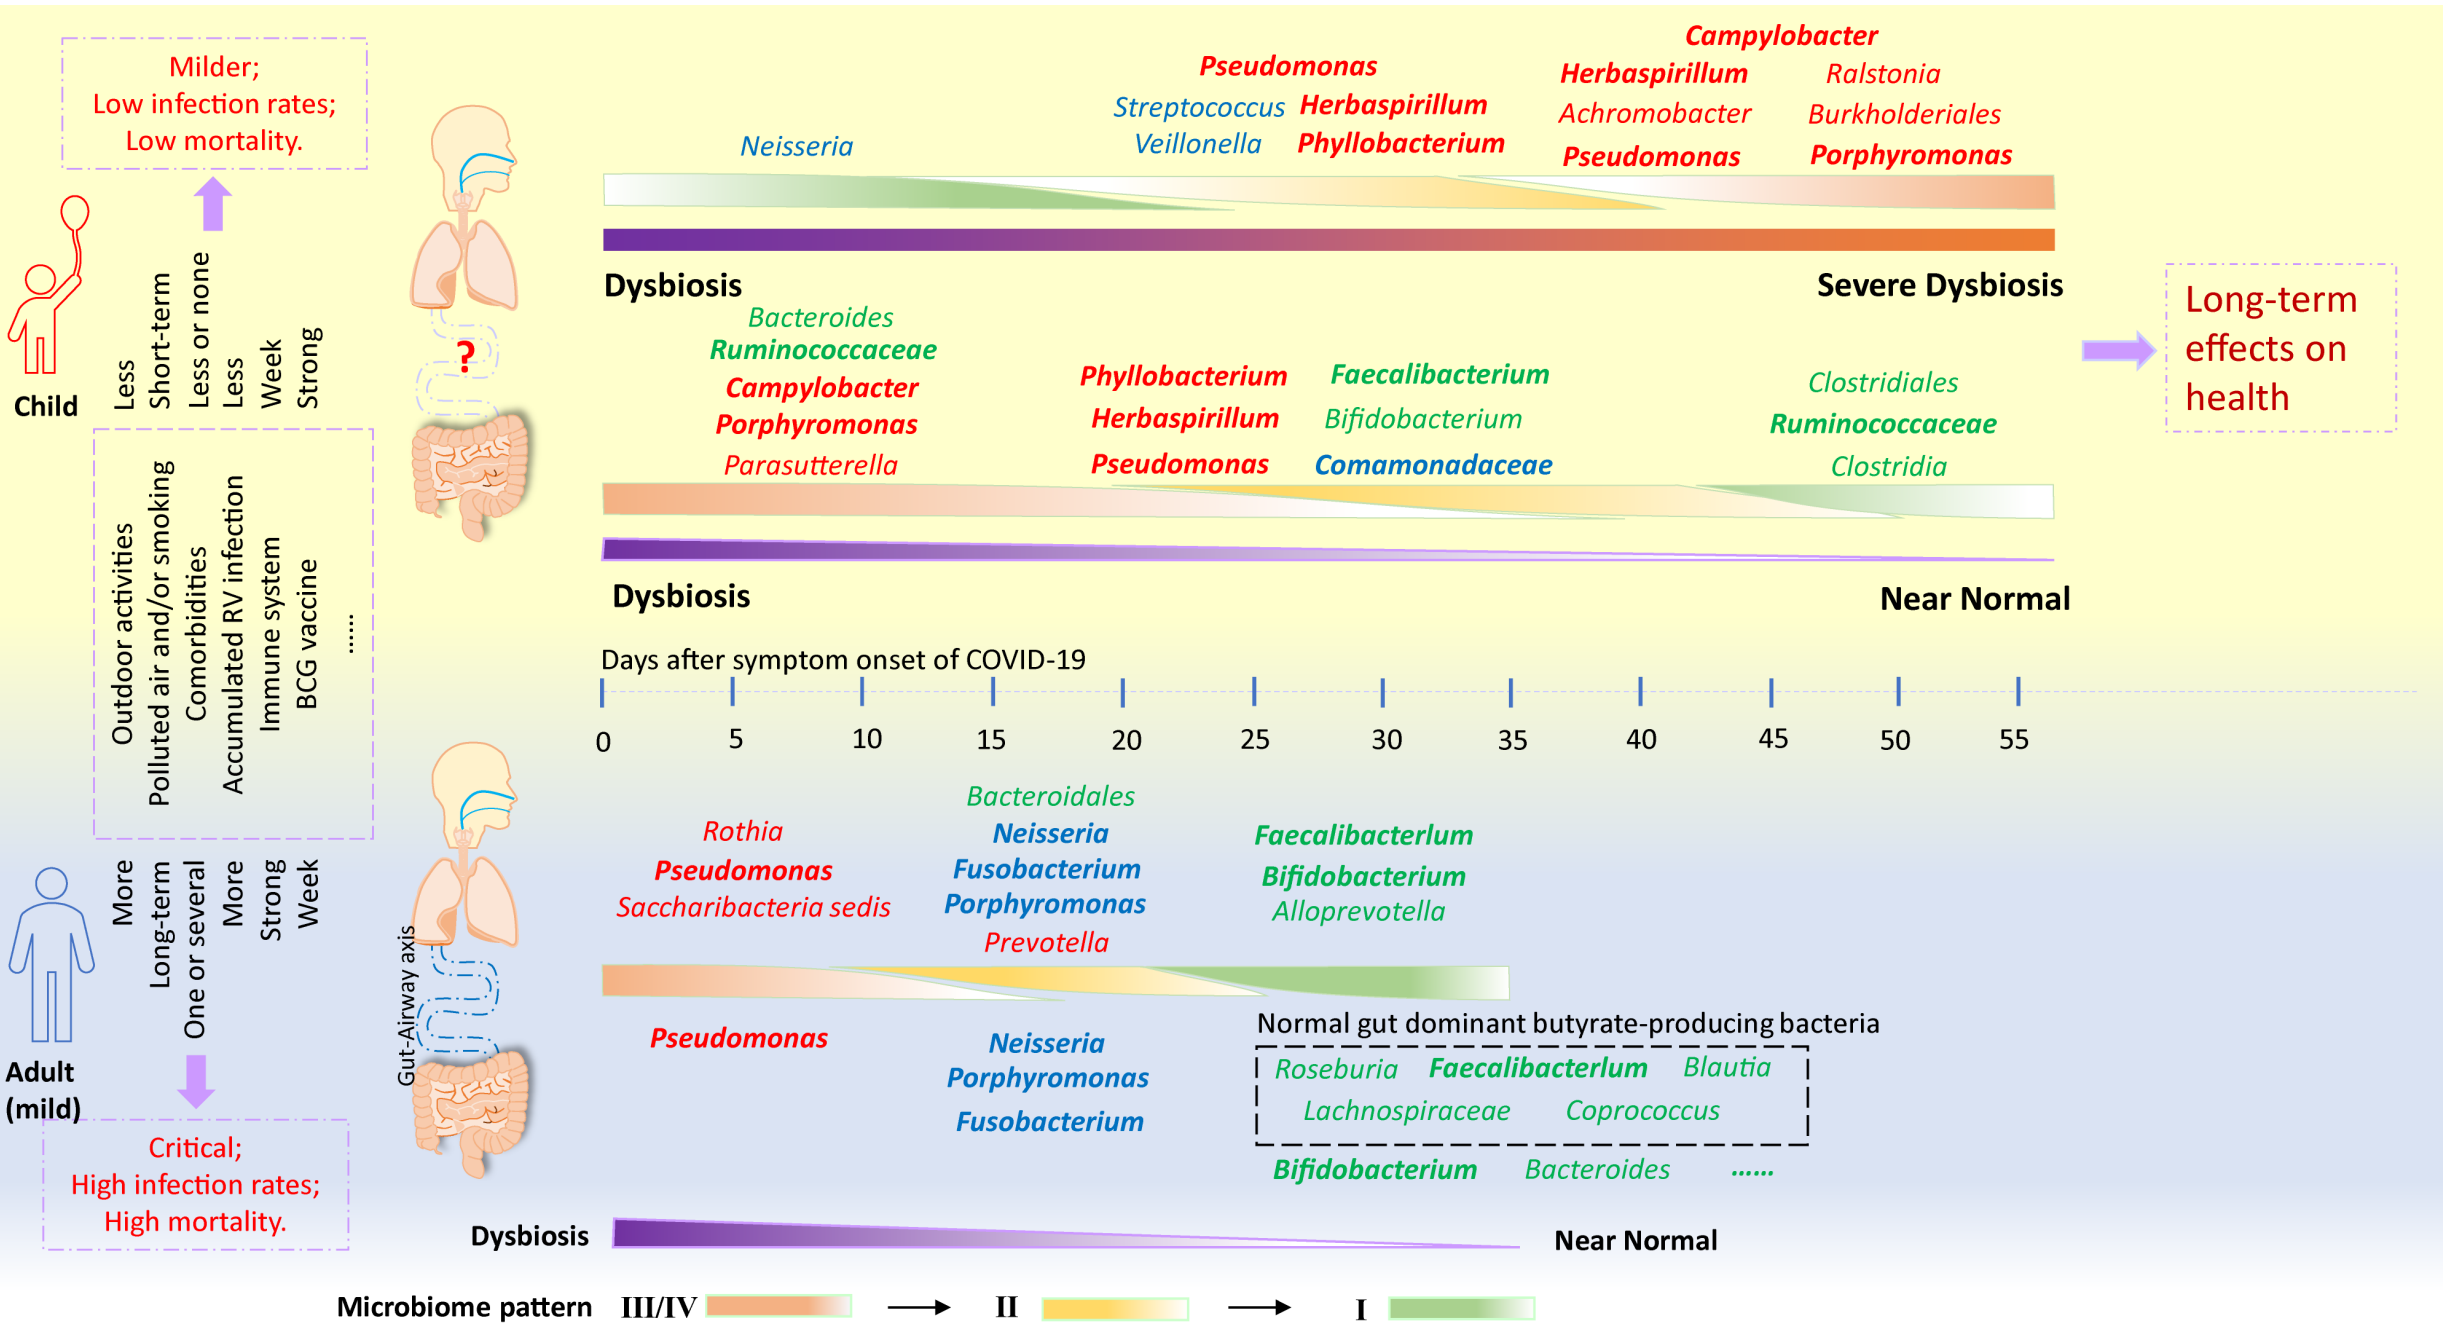

Supplement: Supplementary file [file 2020.07.13.20152181-1.pdf]
